# Supplementary material for: Perturbing proteomes at single residue resolution using base editing
Source: bioRxiv or medRxiv preprint supplement (doi:10.1101/677203), 2020-02-19

WT

$\Delta$

A510P

A510C

YPD

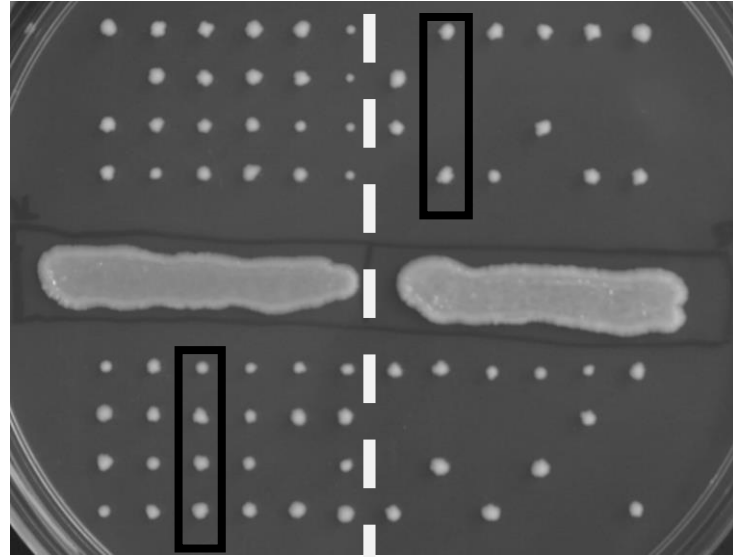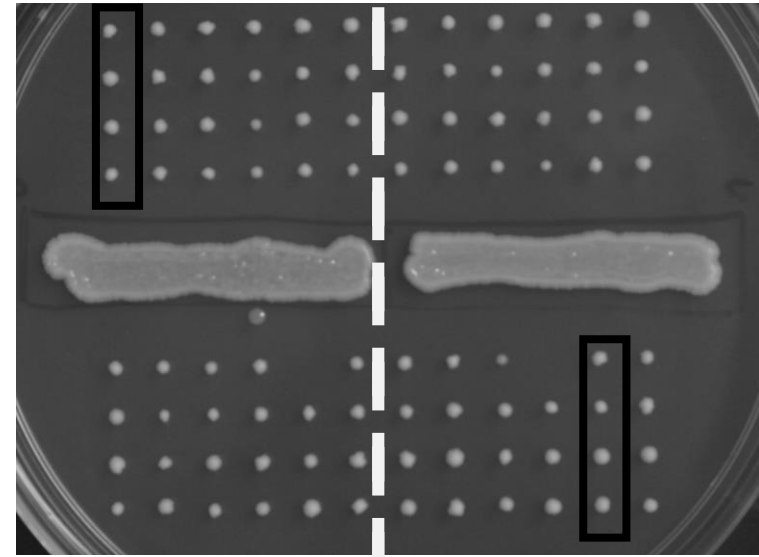

YPD+Nat

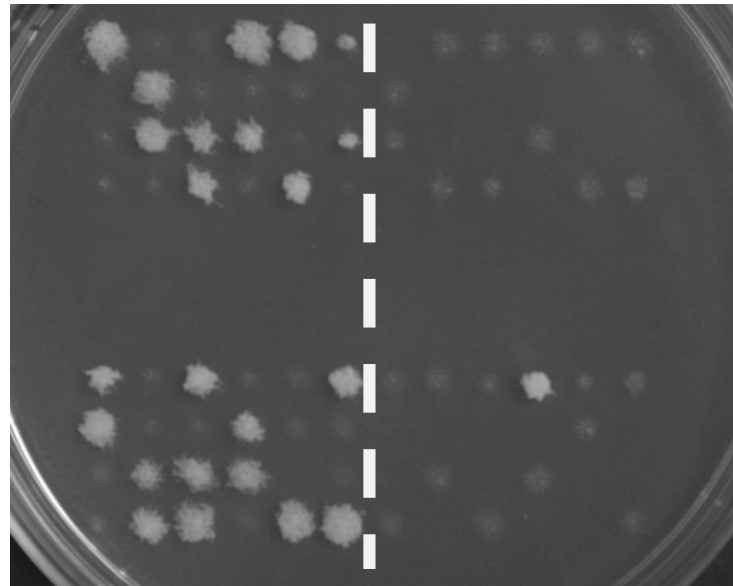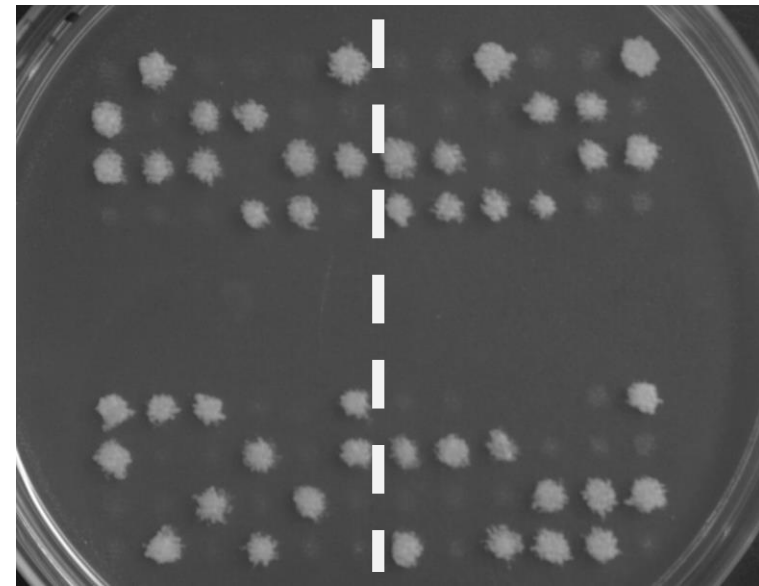

WT

$\Delta$

A540G

A540V

YPD

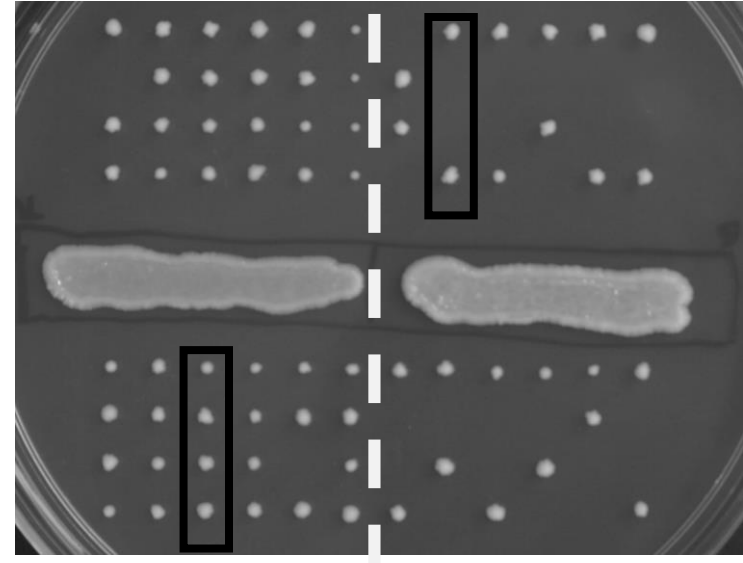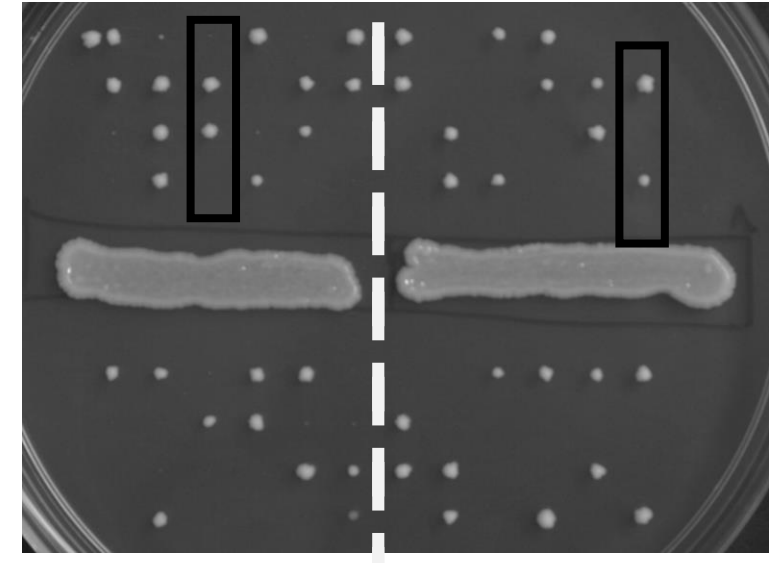

YPD+Nat

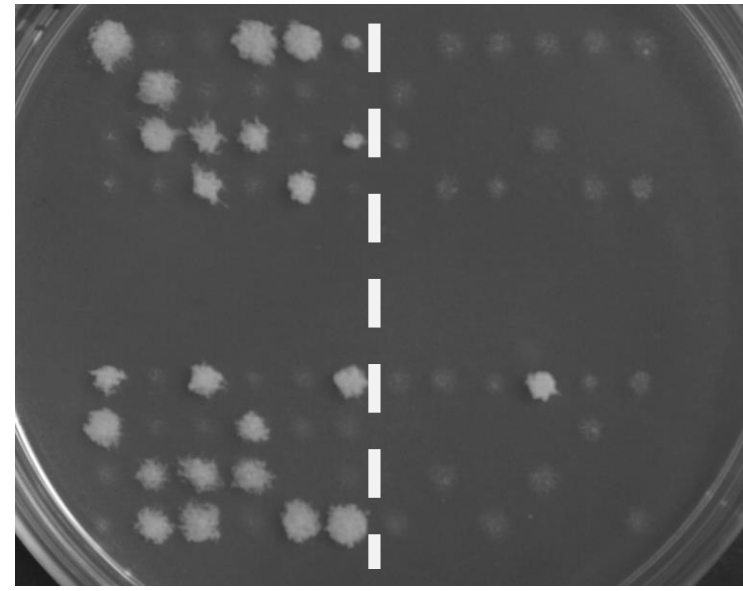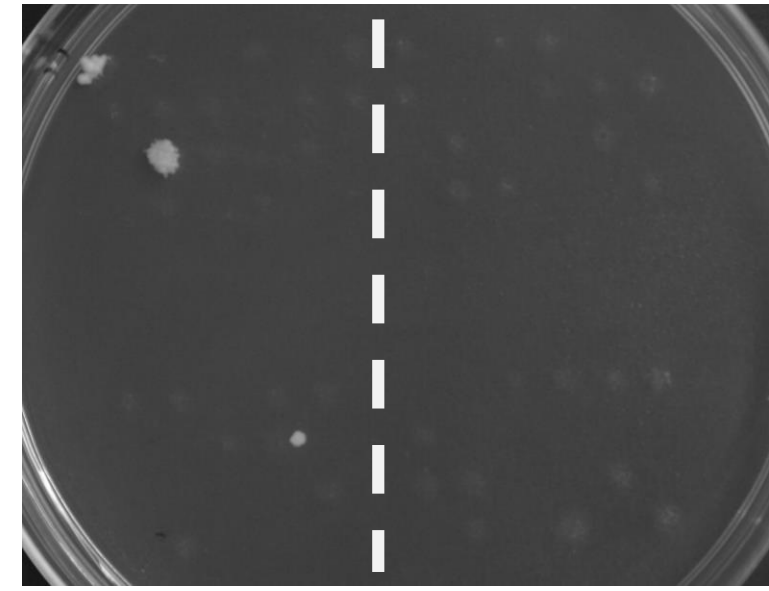

WT

$\Delta$

R523P

R523Q

YPD

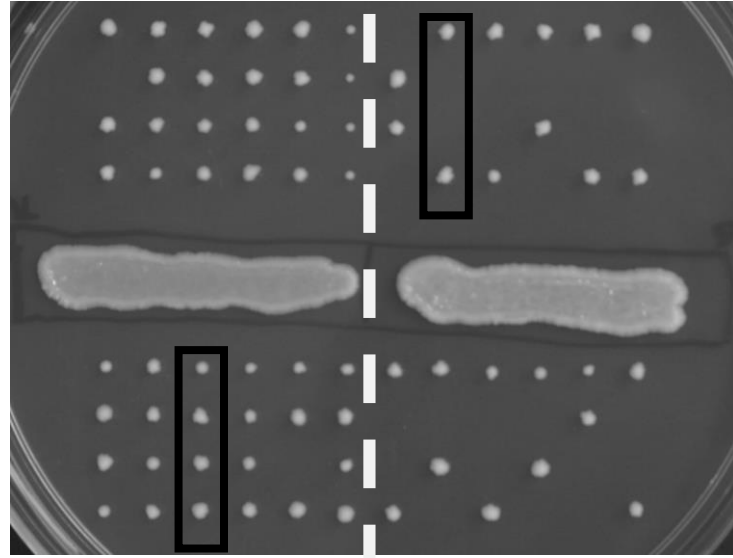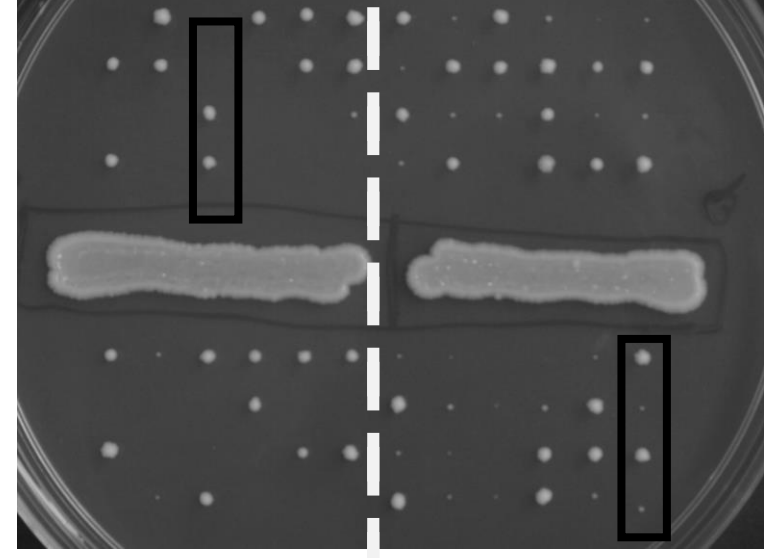

YPD+Nat

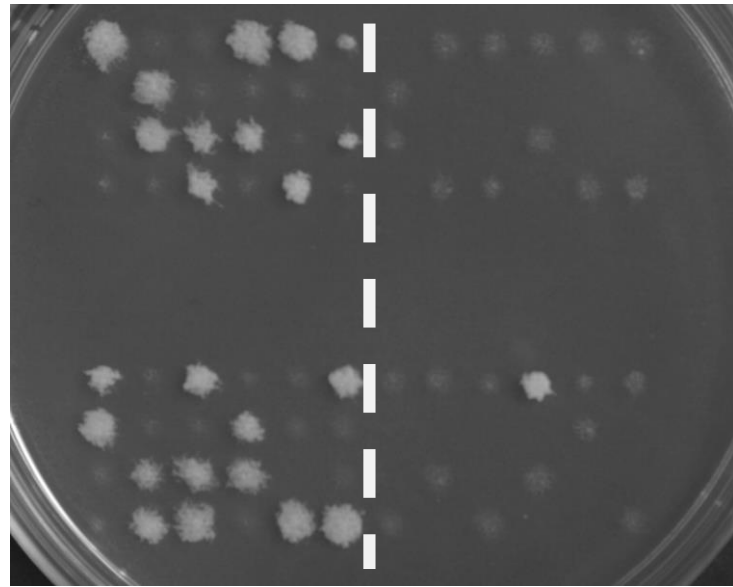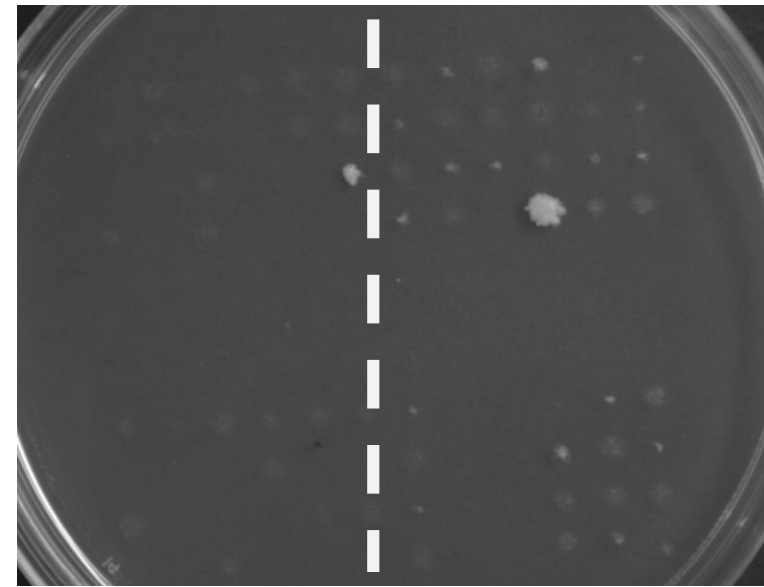

WT

$\Delta$

T486R

T486I

YPD

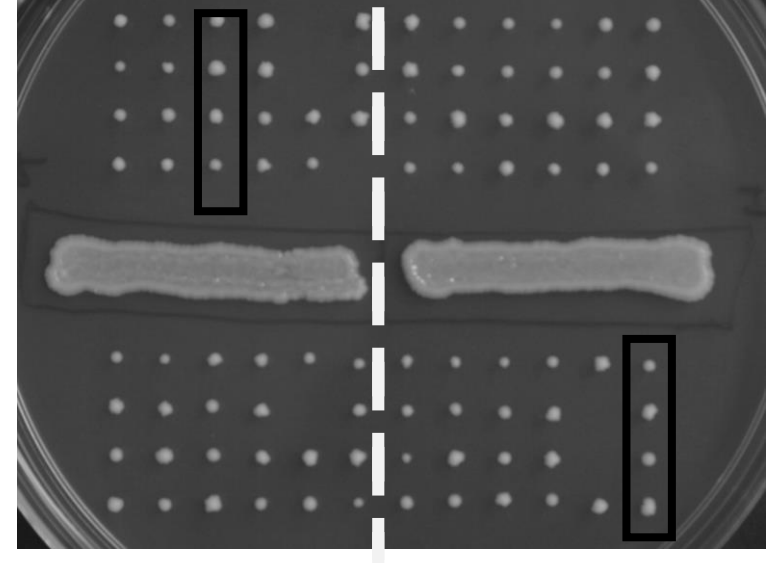

YPD+Nat

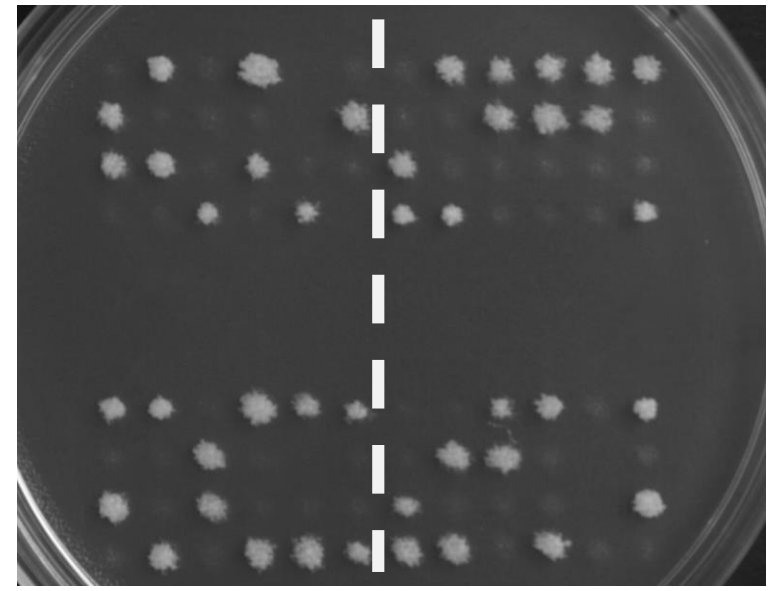

T486D

T486E

T486L

T486C

YPD

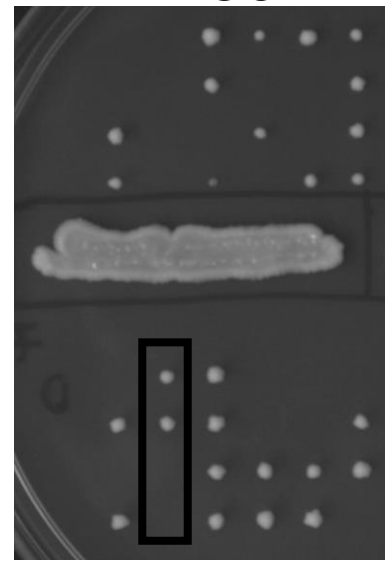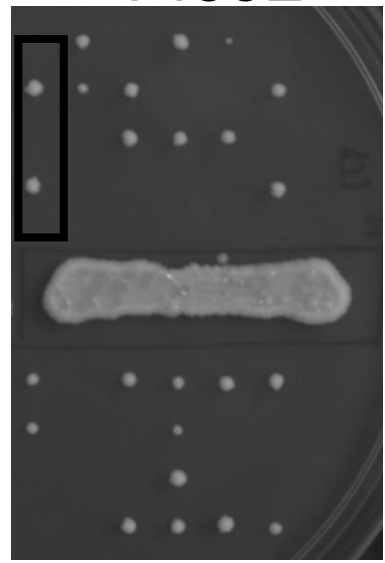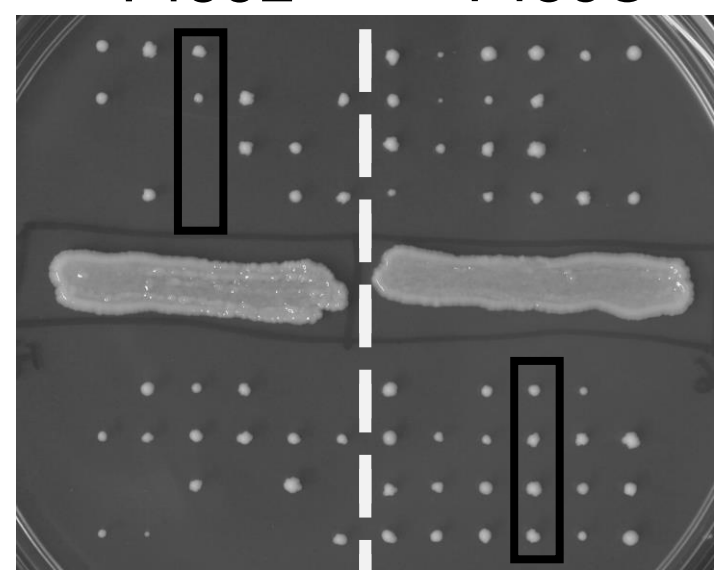

YPD+Nat

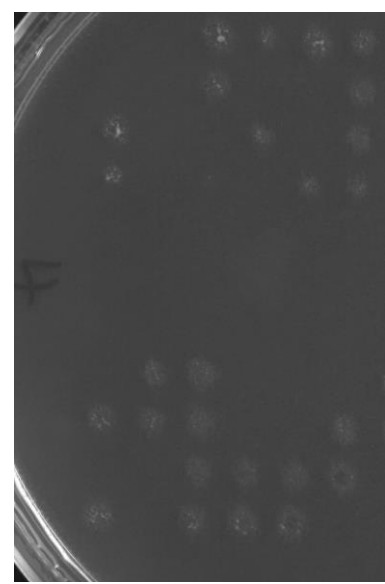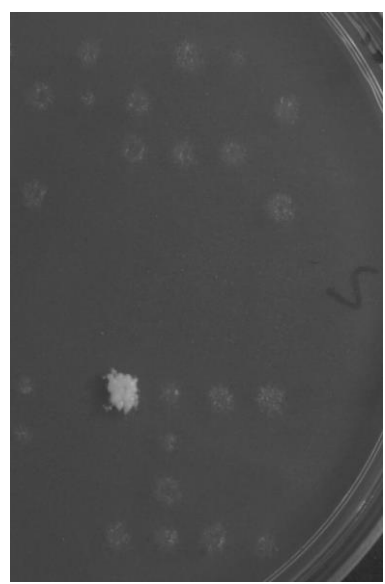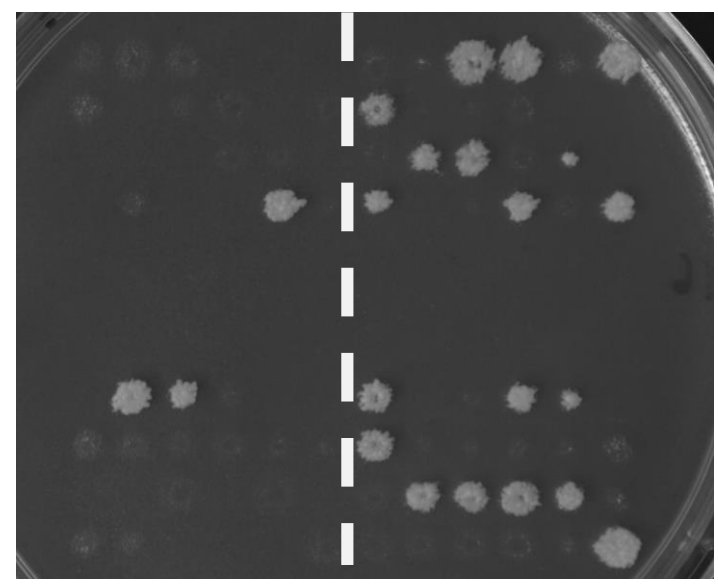

T486T

T486P

YPD

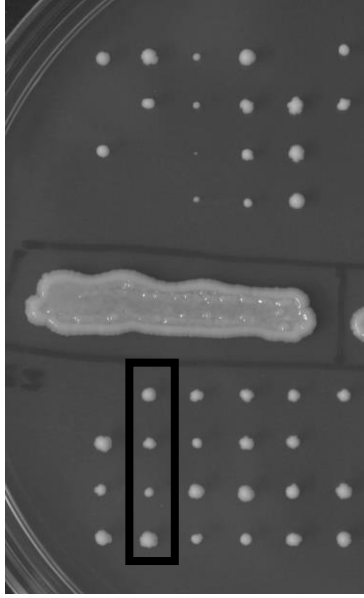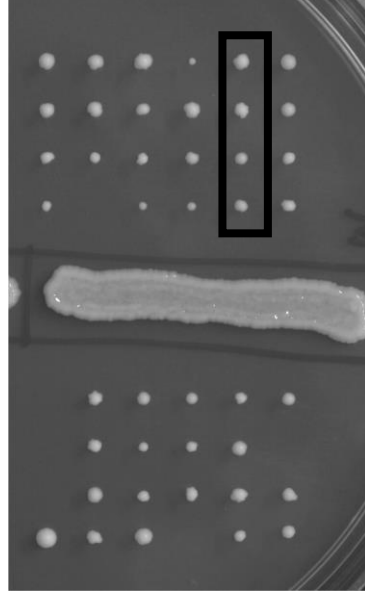

YPD+Nat

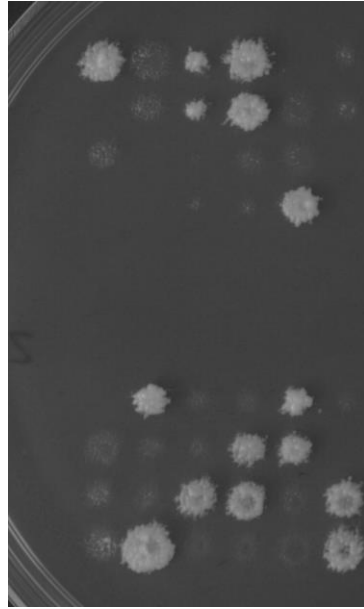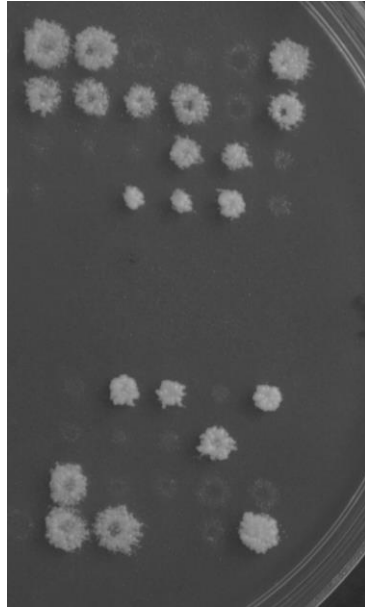

Supplement: Supplementary file [file media-2.pdf]
