# Supplementary material for: Perturbing proteomes at single residue resolution using base editing
Source: bioRxiv or medRxiv preprint supplement (doi:10.1101/677203), 2020-02-19

# RAP1

MoBY WT

MoBY empty

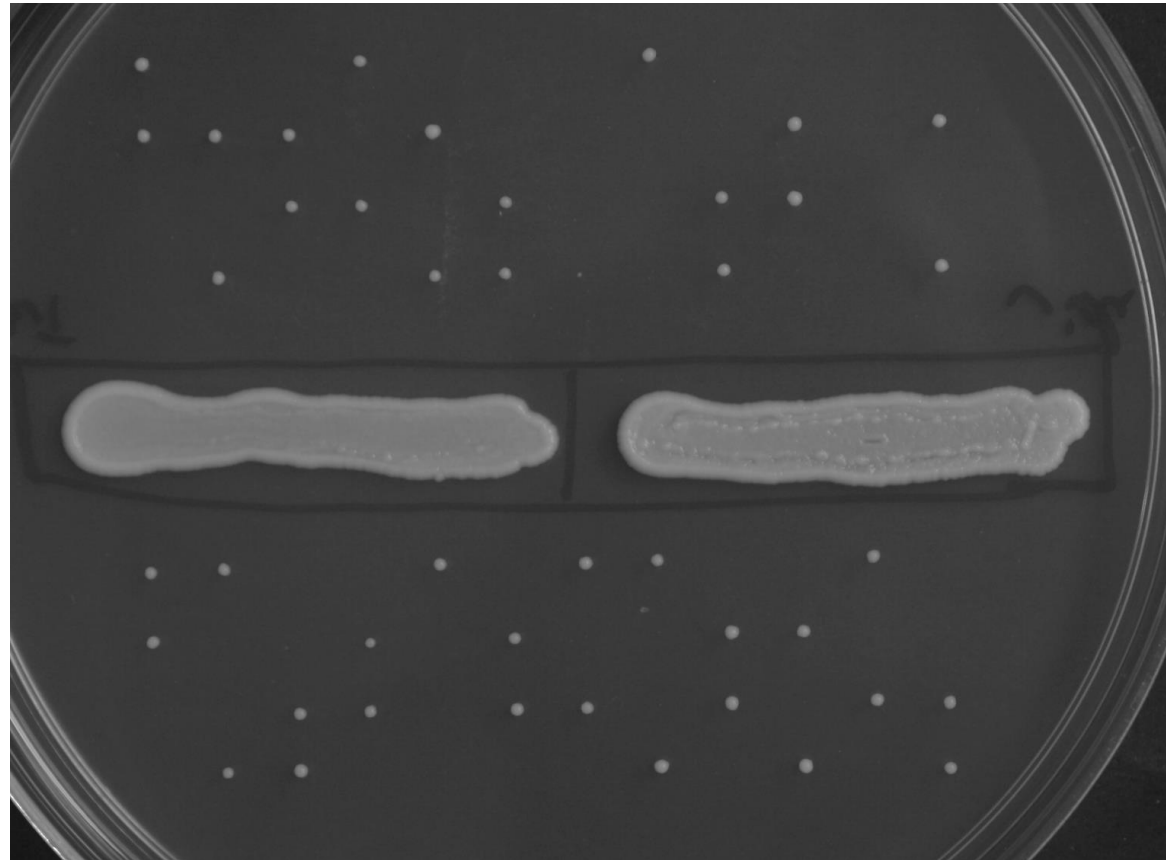

# GLN4

MoBY WT

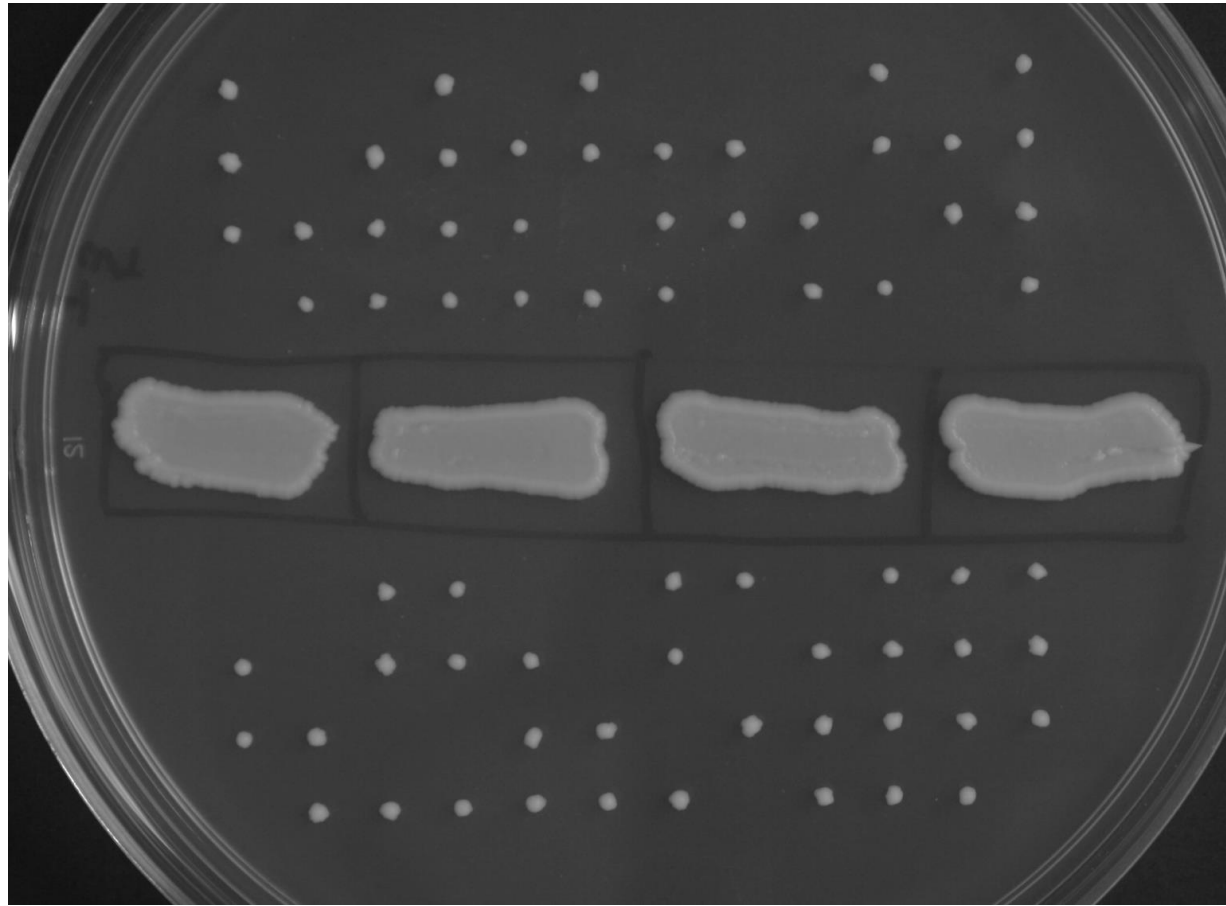

MoBY empty

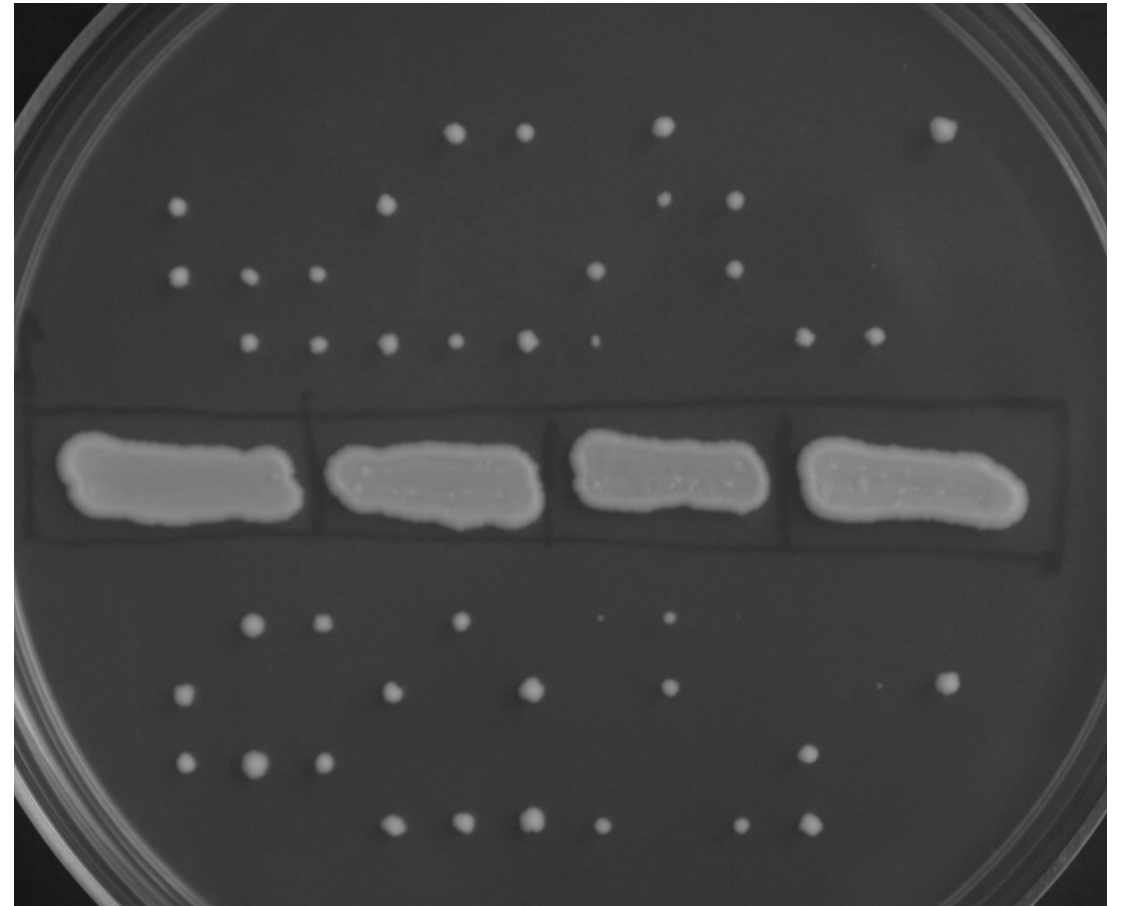

# GLN4

G267R

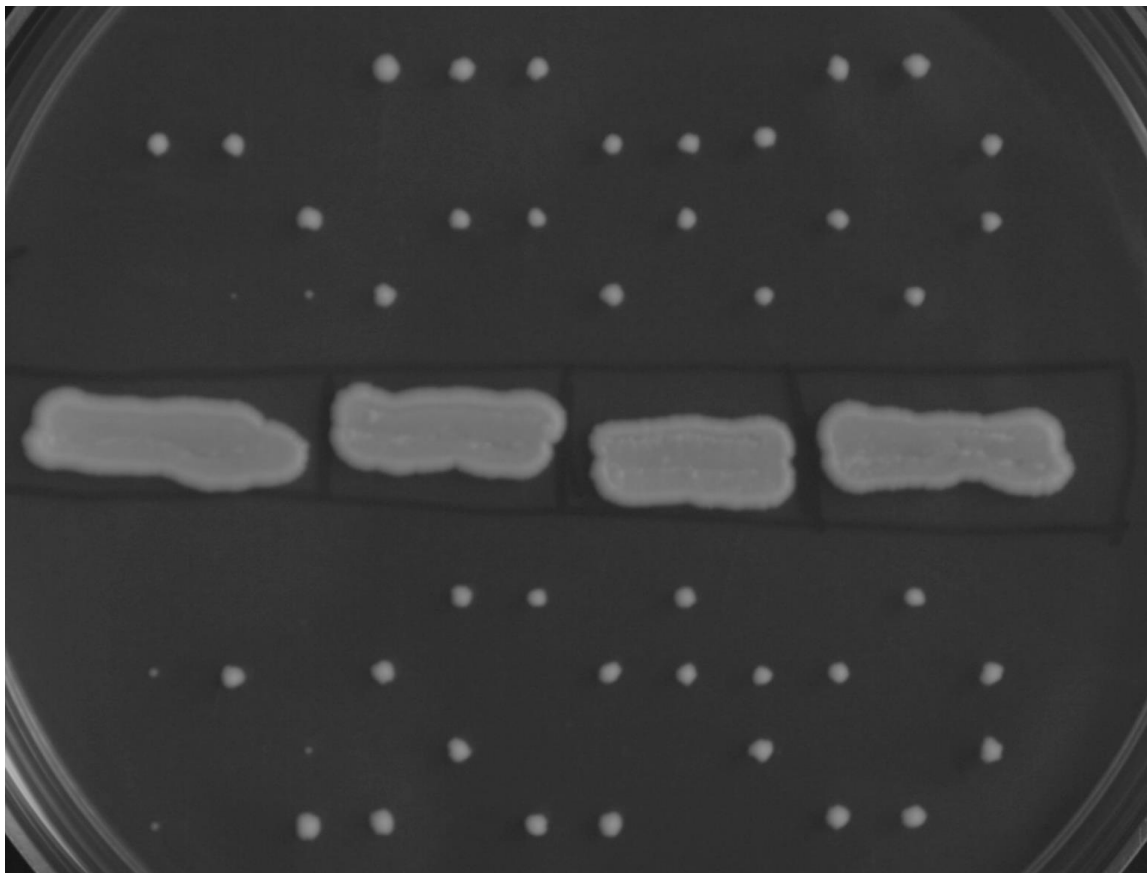

G267S

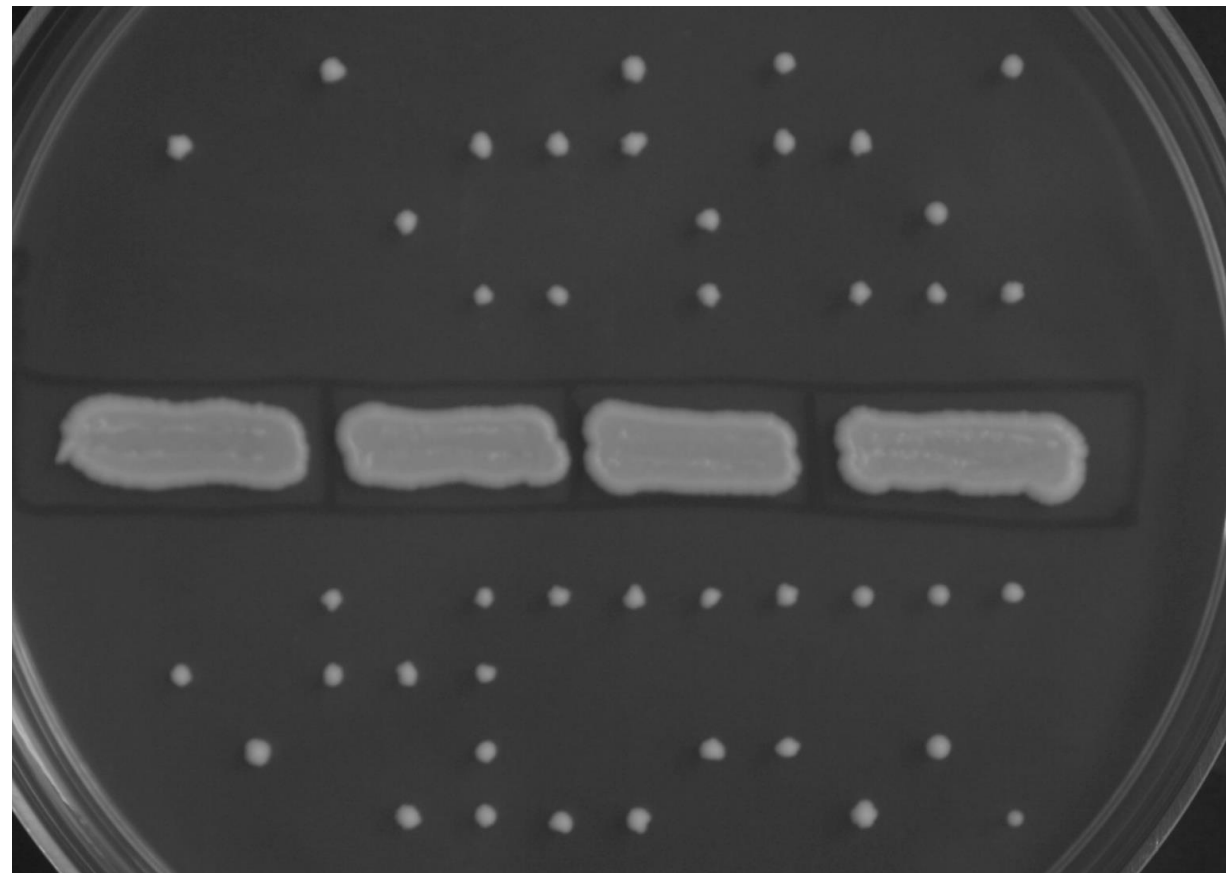

Supplement: Supplementary file [file media-1.pdf]
